# Supplementary material
Source: MDPI journal article supplement (https://www.mdpi.com/2304-6740/10/4/46)
Supplement: s1 [file s1]

# Supporting Information

## Synergistic Effect of Co and Mn co-doping on SnO<sub>2</sub> Lithium-Ion Anodes

*Adele Birrozzi,<sup>1,2,§</sup> Angelo Mullaliu,<sup>1,2,§</sup> Tobias Eisenmann,<sup>1,2</sup> Jakob Asenbauer,<sup>1,2</sup> Thomas Diemant,<sup>1,2</sup>  
Dorin Geiger,<sup>3</sup> Ute Kaiser,<sup>3</sup> Danilo Oliveira Souza,<sup>4</sup> Thomas E. Ashton,<sup>5</sup> Alexandra R. Groves,<sup>5</sup>  
Jawwad A. Darr,<sup>5</sup> Stefano Passerini<sup>1,2</sup> and Dominic Bresser,<sup>1,2,\*</sup>*

<sup>1</sup> *Helmholtz Institute Ulm (HIU), Helmholtzstrasse 11, 89081 Ulm, Germany*

<sup>2</sup> *Karlsruhe Institute of Technology (KIT), P.O. Box 3640, 76021 Karlsruhe, Germany*

<sup>3</sup> *Ulm University, Central Facility for Electron Microscopy, Albert-Einstein-Allee 11, 89081 Ulm, Germany*

<sup>4</sup> *Sincrotrone Trieste, ELETTRA, 34012 Basovizza, TS, Italy*

<sup>5</sup> *University College London (UCL), Department of Chemistry, London WC1H 0AJ, United Kingdom*

**Keywords:** SnO<sub>2</sub>; transition metal doping; reaction mechanism; anode; lithium battery

**\*Corresponding author:** [dominic.bresser@kit.edu](mailto:dominic.bresser@kit.edu)

<sup>§</sup>*These authors contributed equally to this study.*

**Table S1.** Starting structural model for SnO<sub>2</sub> that was used for the Rietveld refinement of the XRD data recorded for SCMO and SCMO@C: Graphical representation of the structure and main structural information (Occ = occupancy).

Space group  $P4_2/mnm$  (136)

Cell length  $a$  = Cell length  $b$  = 4.832336 Å

Cell length  $c$  = 3.243221 Å

Cell angle  $\alpha$  =  $\beta$  =  $\gamma$  = 90°

$Z$  = 2

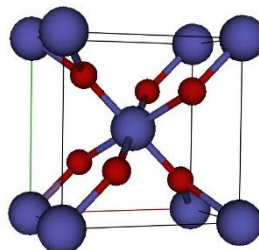

| Atom | X        | Y                   | Z   | Occ | Multiplicity |
|------|----------|---------------------|-----|-----|--------------|
| Sn   | 0.0      | 0.0                 | 0.0 | 1.0 | 2            |
| O    | 0.193448 | 0.806552<br>(= 1-X) | 0.5 | 1.0 | 4            |

**Table S2.** Results of the Rietveld refinement and the applied constraints. The values given in brackets indicate the error.

| Sample                               | SCMO       | SCMO@C     |
|--------------------------------------|------------|------------|
| <b>R<sub>wp</sub> / %</b>            | 5.80696    | 7.55588    |
| <b>a / Å</b>                         | 4.7484(2)  | 4.7498(3)  |
| <b>c / Å</b>                         | 3.1785(2)  | 3.1802(2)  |
| <b>Vol / Å<sup>3</sup></b>           | 71.667(7)  | 71.748(7)  |
| <b>Domain size (equatorial) / μm</b> | 0.00606(4) | 0.00633(4) |
| <b>Domain size (axial) / μm</b>      | 0.01040(6) | 0.01126(8) |
| <b>U<sub>iso</sub>(Sn)</b>           | 0.0143(4)  | 0.0094(4)  |
| <b>Occ(Sn)</b>                       | 0.950(5)   | 0.952(4)   |
| <b>Occ(Mn)</b>                       | 0.025(2)   | 0.024(2)   |
| <b>X(O)</b>                          | 0.1991(7)  | 0.1989(8)  |

---

1.  $U_{iso}(Sn) = U_{iso}(Mn) = U_{iso}(Co)$
2.  $Occ(Sn) + Occ(Mn) + Occ(Co) = 1$
3.  $Occ(Mn) = Occ(Co)$
4.  $X(Sn) = X(Mn) = X(Co) = 0, \quad Y(Sn) = Y(Mn) = Y(Co) = 0, \quad Z(Sn) = Z(Mn) = Z(Co) = 0$

**Table S3.** Comparison of the experimental Mn and Co K-edge absorbance edge step with values that were calculated for a composition of  $\text{Sn}_{0.9}\text{Co}_{0.05}\text{Mn}_{0.05}\text{O}_2$  and  $\text{Sn}_{0.95}\text{Co}_{0.025}\text{Mn}_{0.025}\text{O}_2$ , following the results of the Rietveld refinement of the XRD data, the EDX data, and the initial precursor ratio. The experimental values were recorded in transmission mode.

| <b>K-edge<br/>absorbance step</b> | <b>Experimental</b> | <b>Calculated</b>                                                             |                                                                                  |
|-----------------------------------|---------------------|-------------------------------------------------------------------------------|----------------------------------------------------------------------------------|
|                                   |                     | <b><math>\text{Sn}_{0.9}\text{Co}_{0.05}\text{Mn}_{0.05}\text{O}_2</math></b> | <b><math>\text{Sn}_{0.95}\text{Co}_{0.025}\text{Mn}_{0.025}\text{O}_2</math></b> |
| <b>Mn</b>                         | 0.014               | 0.024                                                                         | 0.011                                                                            |
| <b>Co</b>                         | 0.017               | 0.029                                                                         | 0.014                                                                            |

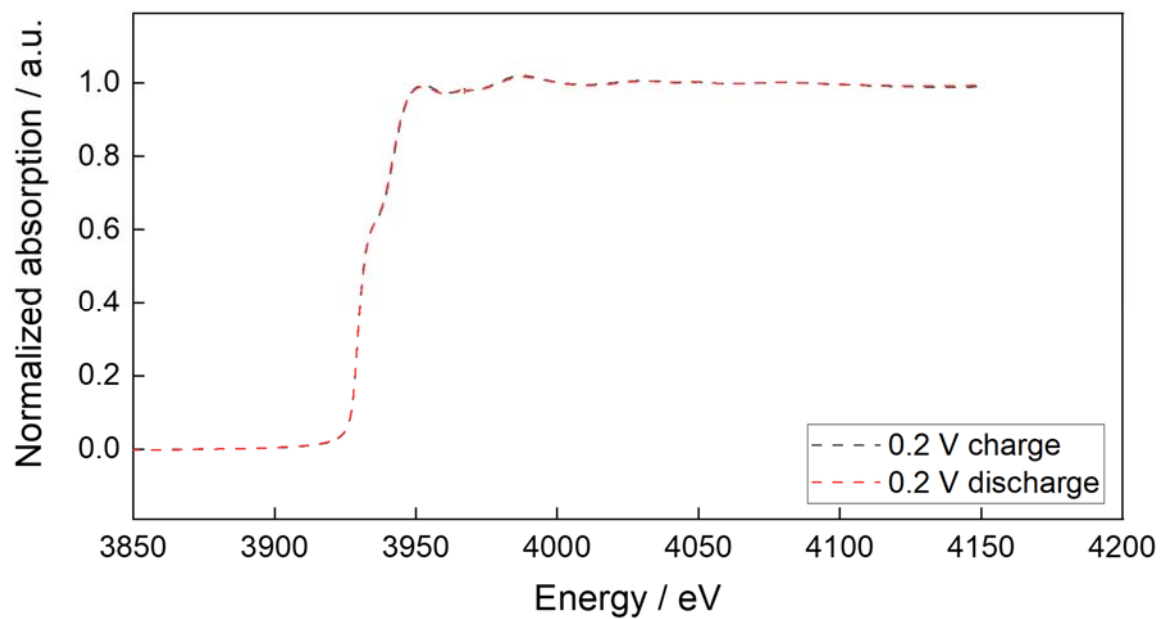

**Figure S1.** Comparison of the Sn L<sub>3</sub>-edge X-ray absorption spectra of the SCMO@C-based electrodes discharged (in red) and charged (in black) to 0.2 V.

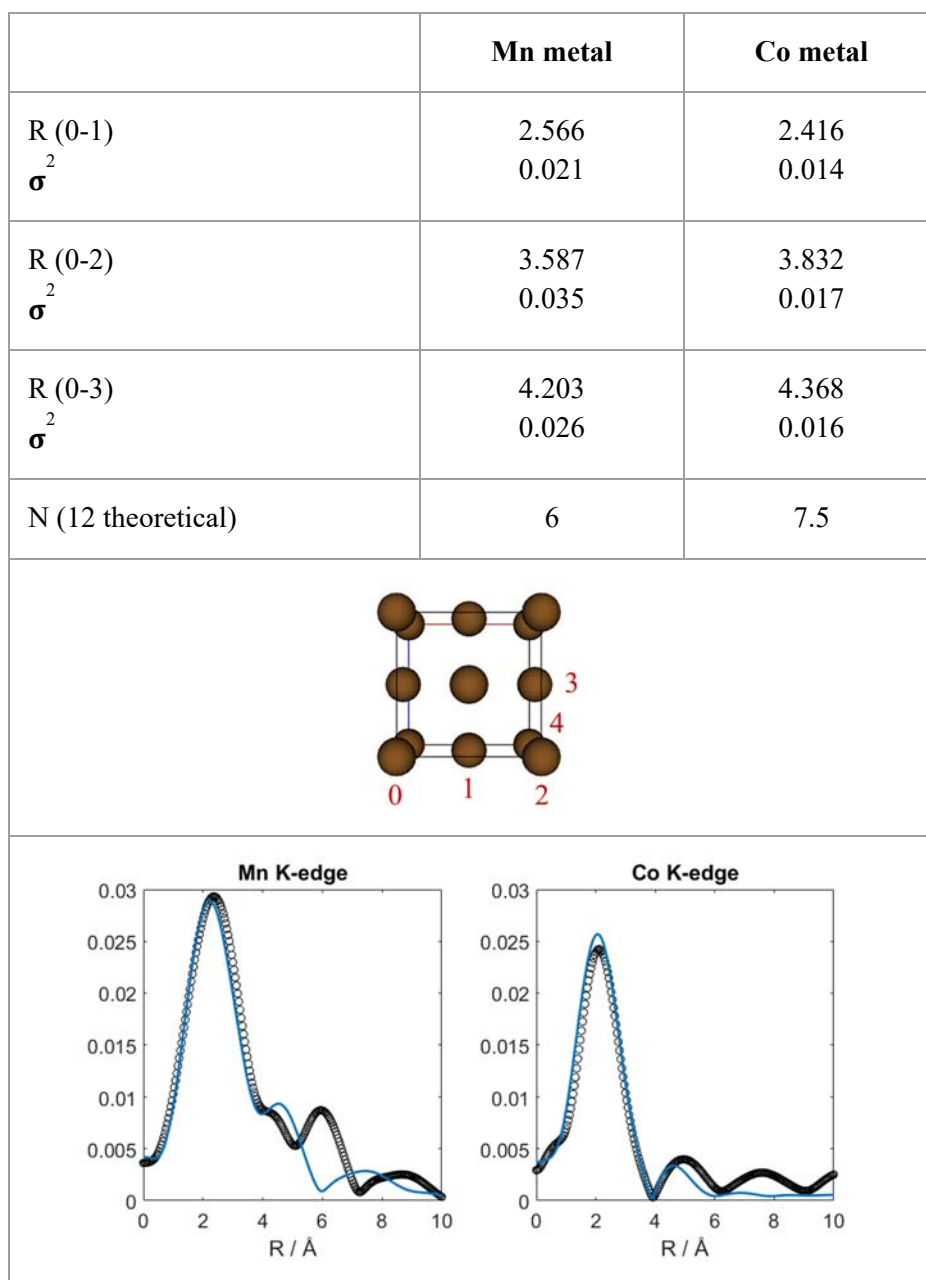

**Figure S2.** EXAFS analysis of the Mn and Co K-edge data obtained for the fully lithiated state of the SCMO@C-based electrode (0.01 V). The Fourier transform of the EXAFS signal matches well a fit (bottom panel), which assumes Mn metal and Co metal, respectively. As shown in the top panel, the first-shell (R0-1), the second-shell (R0-2), and the third-shell distances (R0-3) are deformed and different from the literature. This is attributed to the fact that the electrochemically formed metals in SCMO have a much higher degree of disorder than the standard references – as also confirmed by the lower average coordination number (N).

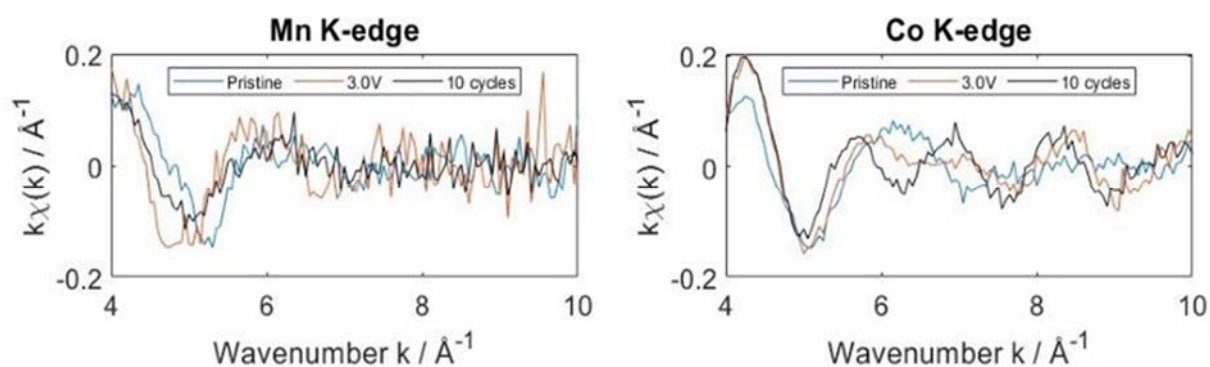

**Figure S3.** EXAFS signal at the Mn (left) and Co (right) K-edge for the pristine SCMO@C-based electrode and the *ex situ* samples charged to 3.0 V in the first cycle and after 10 cycles. Due to the low amount of the two TMs in the sample, the EXAFS signal is very noisy rendering any meaningful analysis of these data impossible.
